# Supplementary material for: Moisture-dependent mechanical properties of longitudinally compressed wood
Source: Springer Nature journal article supplement (doi:10.1007/s00107-019-01448-1), 2019-08-30
Supplement: MOESM1 [file 17124432]

# Moisture-dependent Mechanical Properties of Longitudinally Compressed Wood

European Journal of Wood and Wood Products

Mátyás BÁDER<sup>1\*</sup>, Róbert NÉMETH<sup>1</sup>

<sup>1</sup>University of Sopron, Simonyi Károly Faculty of Engineering, Wood Sciences and Applied Arts, Institute of Wood Science. 4 Bajcsy-Zsilinszky Street, 9400 Sopron, Hungary

Contact details:

Mátyás BÁDER corresponding author

E-mail: [bader.matyas@uni-sopron.hu](mailto:bader.matyas@uni-sopron.hu)

Róbert NÉMETH co-author

E-mail: [nemeth.robert@uni-sopron.hu](mailto:nemeth.robert@uni-sopron.hu)

## ELECTRONIC SUPPLEMENTARY MATERIAL 1

Change of selected mechanical properties with each 1% change of moisture content (valid in the moisture content range in brackets, rounded to 0.5). Complementary table to Table 1. Abbreviations: FSP-Fiber saturation point

| Shear strength   | Hardness (end-grain) | Hardness (side)   | Impact strength   | Twisting        |                           |
|------------------|----------------------|-------------------|-------------------|-----------------|---------------------------|
| 2-4%<br>(10-25%) | -<br>-               | -<br>-            | -<br>-            | 3%<br>-         | Vorreiter<br>(1949)       |
| 3%<br>(8%-FSP)   | 4%<br>(0%-FSP)       | 2.5%<br>(0%-FSP)  | -<br>-            | 2%*<br>(5%-FSP) | Kollmann<br>(1951)        |
| -<br>-           | 2.5%<br>(0%-30%)     | 2.5%<br>(0%-30%)  | -<br>-            | -<br>-          | Lohmann et al.<br>(1987)  |
| -<br>-           | -<br>-               | -<br>-            | -<br>-            | -<br>-          | Skaar (1988)              |
| -<br>-           | 3%*<br>(0%-FSP)      | 2.5%*<br>(0%-FSP) | 1.5%*<br>(5%-FSP) | -<br>-          | Niemz (1993)              |
| 3%<br>-          | -<br>-               | -<br>-            | -<br>-            | -<br>-          | Sitkei (1994)             |
| 3%<br>(8%-FSP)   | 4%<br>(0%-FSP)       | 2.5%<br>(0%-FSP)  | 2.5%<br>(0%-FSP)  | -<br>-          | Molnár (2004)             |
| 3%<br>(0%-FSP)   | 4%<br>(0%-FSP)       | 2.5%<br>(0%-FSP)  | -<br>-            | -<br>-          | Winandy and Rowell (2005) |

\*If FSP is considered as 25%

## REFERENCES

- Kollmann FFP (1951) Technology of woods and wood materials. Springer-Verlag, Berlin Heidelberg, Germany
- Lohmann U, Annies T, Ermschel D (1987) Wood-Handbook, 3., völlig überarb. Aufl. DRW-Verl, Leinfelden-Echterdingen
- Molnár S (2004) Wood material knowledge. Mezőgazdasági Szaktudás Kiadó, Budapest, Hungary
- Niemz P (1993) Physics of wood and wood-based materials. DRW-Verl, Leinfelden-Echterdingen
- Sitkei Gy (ed) (1994) Theory of woodworking operations. Mezőgazdasági Szaktudás Kiadó, Budapest, Hungary
- Skaar C (1988) Wood-water relations. Springer-Verlag, Berlin, Germany
- Vorreiter L (1949) Woodtechnological handbook, volume I. Georg Fromme & Co., Wien, Austria
- Winandy JE, Rowell RM (2005) Chemistry of wood strength. In: Rowell RM (ed) Handbook of wood chemistry and wood composites. CRC Press, Boca Raton, Fla, U.S.A., p 485
